# Supplementary material for: Improving the clinical interpretation of missense variants in X linked genes using structural analysis
Source: PubMed Central journal article supplement (PMC8961765; doi:10.1136/jmedgenet-2020-107404), 2021-03-25
Supplement: jmedgenet-2020-107404supp001.pdf [file jmedgenet-2020-107404supp001.pdf]

Table S1. A list of the features retrieved and used to annotate the variants for each of the 21 genes. The general features were retrieved in all genes, whereas the gene-specific features were only available in certain genes.

**Variant features considered in all genes (general features)**

- i) Protein variants within sequences with a known 3D structure.* Across the 21 genes, the majority of pathogenic variants lie within modelled regions (i.e. regions with a known structure or regions shared between the homologous template and the protein sequence) compared to the benign variants.
- ii) Residue-volume and molecular goodness-of-fit.* All low-energy side chain conformations were assessed and their “goodness-of-fit” evaluated to determine the steric clashes with the neighbouring residues created through replacing smaller residues with larger ones. It was hypothesized that a larger number of dataset P variants create more steric clashes indicating the introduction of van der Waals’ overlaps between the close atoms. This was expected to correlate with the results found in volume-change where a higher number of dataset P variants result in the replacement of smaller residues with larger ones. Replacing larger residues with smaller ones, especially in the core of a protein is also expected to destabilise protein structure. Therefore, the variants leading to the disruption of packing interactions are more likely to be pathogenic.
- iii) Variants altering charged residues.* Alterations in both negatively and positively charged residues in certain proteins like ion channels are likely to affect function. The loss of charged residues on the surface of a protein may lead to disruption of intermolecular as well as intramolecular interactions. Similarly, the introduction of charged residues to the core of a protein is likely to disrupt hydrophobic interactions and destabilise the protein.
- iv) Variants altering hydrophobic residues.* Replacing a hydrophobic residue with a hydrophilic one, especially in a transmembrane region or core of a protein, can result in loss of hydrophobic

interactions leading to structural instability. Similarly, introduction of a hydrophobic residue on the surface of a protein can make protein aggregation more likely.

*v) Side-chain solvent accessibility.* Residues can be hidden in the core of the protein or be solvent accessible on the surface. Measuring solvent accessibility to each residue allows for the categorization of the residues from completely hidden to fully accessible on the surface and anywhere in between. The dataset P variants in most of the proteins were identified to be towards the core of the protein rather than on the surface.

*vi) Conservation at variant's site.* The loss of a conserved residue is more likely to be detrimental to the structure and function of the protein. In particular, when the change is less conservative, i.e. replacement of a residue with another with very different physicochemical properties. The dataset P variants are expected to result in the loss of more conserved residues compared to the dataset N variants.

*vii) Alteration in residues with special physicochemical properties.* Variants involving glycine, proline, and cysteine were considered to more likely affect protein structure. Glycine is the smallest of the residues and replacing it in the core of a protein with any of the larger residues can create stress on the structure and destabilize the protein. The introduction of glycine into the core of a protein to replace one of the larger residues can also result in instability. Similarly, replacing proline with most other residues, or vice versa, is more likely to be destabilizing due to its unique ring-shaped structure. Proline can introduce a turn in the structure, such as in tight turns, which other residues can't replicate. The loss or gain of cysteine was also considered where surface/extracellular variants are likely to lead to the loss or formation of disulphide bonds, respectively, causing protein instability.

*viii) Disease propensity at the site of variant.* The loss of residues previously associated with the disease are more likely to be pathogenic when mutated. This is equivalent to the residue having mutated more than once in the dataset for each protein.

*ix) The secondary structure of the site of variant.* Beta strands or alpha helices can be less tolerant to certain changes compared to loops. The introduction of a proline onto a beta strand, for instance, is likely to effectively break the strand and disturb the hydrogen bonds forming a beta sheet, whereas the same change may be more tolerated on an alpha helix.

*x) Effect on protein-protein interaction and protein stability*

The likelihood of the site of the variant being involved in protein-protein interaction were predicted using an external tool. The effect of the variants on protein stability was also predicted. More of the disease-implicated variants are likely to destabilize the protein structure or be involved in interactions.

*xi) Disorders regions.* Disordered regions are more flexible in nature and promiscuous in their ability to bind proteins. Variants in these regions can easily disturb this finely tuned region resulting in more sensitive and less specific, i.e. non-functional, binding which can lead to binding disruption or aggregation.

#### **Variant features considered in certain genes (gene-specific features)**

*i) Variant clustering.* In the proteins where variant-clustering was noted in dataset P in comparison to dataset B through visual inspection. The protein was either divided into halves by drawing a plain through the centre of its mass or it was separated into multiple protein/functional domains. Variant clustering based on the secondary structure was also considered.

*ii) Functional site.* Variations at functional sites, including binding sites, are more likely to affect protein function.

Table S2. A list of the 21 X-linked genes included in this study and the diseases associated with these genes. The transcripts were those chosen by the Human Gene Mutation Database.

| <u>Genes</u> | <u>Transcript</u> | <u>Associated Disorders</u>                                                       | <u>Phenotype MIM</u>           |
|--------------|-------------------|-----------------------------------------------------------------------------------|--------------------------------|
| <i>G6PD</i>  | ENST00000393564   | Haemolytic anaemia                                                                | 300908                         |
| <i>ALAS2</i> | ENST00000650242   | Sideroblastic anaemia 1, Erythropoietic protoporphyria                            | 300751, 300752                 |
| <i>RS1</i>   | ENST00000379984   | Retinoschisin                                                                     | 312700                         |
| <i>MTM1</i>  | ENST00000370396   | Myotubular myopathy                                                               | 310400                         |
| <i>OTC</i>   | ENST00000039007   | Ornithine transcarbamylase deficiency                                             | 311250                         |
| <i>PHEX</i>  | ENST00000379374   | Hypophosphatemic rickets                                                          | 307800                         |
| <i>F8</i>    | ENST00000360256   | Hemophilia A                                                                      | 306700                         |
| <i>IL2RG</i> | ENST00000374202   | Moderate combined immunodeficiency, Severe combined immunodeficiency              | 312863, 300400                 |
| <i>L1CAM</i> | ENST00000370060   | Partial agenesis of corpus callosum, CRASH syndrome, Hydrocephalus, MASA syndrome | 304100, 303350, 307000, 303350 |
| <i>CLCN5</i> | ENST00000307367   | Dent disease, Hypophosphatemic rickets, Nephrolithiasis I, Proteinuria            | 300009, 300554, 310468, 308990 |
| <i>IDS</i>   | ENST00000340855   | Mucopolysaccharidosis II                                                          | 309900                         |
| <i>GLA</i>   | ENST00000218516   | Fabry disease (systemic)                                                          | 301500                         |
| <i>ABCD1</i> | ENST00000218104   | Adrenomyeloneuropathy                                                             | 300100                         |
| <i>F9</i>    | ENST00000218099   | Hemophilia B                                                                      | 306900                         |
| <i>GJB1</i>  | ENST00000361726   | Charcot-Marie-Tooth neuropathy                                                    | 302800                         |
| <i>AVPR2</i> | ENST00000337474   | Nephrogenic diabetes insipidus, Nephrogenic syndrome inappropriate antidiuresis   | 304800, 300539                 |
| <i>PDHA1</i> | ENST00000422285   | Pyruvate dehydrogenase E1- $\alpha$ deficiency                                    | 312170                         |
| <i>BTK</i>   | ENST00000308731   | Agammaglobulinemia, Isolated GH deficiency III with agammaglobulinemia            | 300755, 307200                 |
| <i>OCRL</i>  | ENST00000371113   | Lowe syndrome, Dent disease 2                                                     | 309000, 300555                 |
| <i>NDP</i>   | ENST00000642620   | Norrie disease, Exudative vitreoretinopathy 2                                     | 310600, 305390                 |
| <i>HPRT1</i> | ENST00000298556   | Lesch-Nyhan syndrome, Gout (HPRT)                                                 | 300322, 300323                 |



Table S3. The experimentally-solved structures and the homologous templates used in analyzing the missense variants of the 21 genes. An available protein structure (s) was used for variant analysis in some the proteins, whereas a homologous model (m) was used for those proteins without a solved structure.

| <u>Genes</u> | <u>Structure(s)/Model(m)</u>          | <u>Sequence identity (%)</u> | <u>Sequence coverage (%)</u> |
|--------------|---------------------------------------|------------------------------|------------------------------|
| <i>G6PD</i>  | 2BHL(s)                               | -                            | 95                           |
| <i>ALAS2</i> | 5QQQ(s)                               | -                            | 77                           |
| <i>RS1</i>   | 3JD6(s)                               | -                            | 75                           |
| <i>MTM1</i>  | 1M7R(m)                               | 67                           | 95                           |
| <i>OTC</i>   | 1FVO(s)                               | -                            | 90                           |
| <i>PHEX</i>  | 4CTH(m)                               | 37                           | 91                           |
| <i>F8</i>    | 6MF2(m)                               | 97                           | 64                           |
| <i>IL2RG</i> | 2ERJ(m)                               | 99                           | 63                           |
| <i>L1CAM</i> | 3DMK(m)                               | 22                           | 58                           |
| <i>CLCN5</i> | 6QVB(m)                               | 28                           | 83                           |
| <i>IDS</i>   | 6IOZ(s)                               | -                            | 93                           |
| <i>GLA</i>   | 1R47(s)                               | -                            | 92                           |
| <i>ABCD1</i> | 6JBJ(m)                               | 27                           | 78                           |
| <i>F9</i>    | 5EDM(m)                               | 34                           | 89                           |
| <i>GJB1</i>  | 2ZW3(m)                               | 66                           | 76                           |
| <i>AVPR2</i> | 4ZJH(m)                               | 24                           | 83                           |
| <i>PDHA1</i> | 3EXH(m)                               | 100                          | 93                           |
| <i>BTK</i>   | 4Y93(m), 4XI2(m)                      | 97                           | 94                           |
| <i>OCRL</i>  | 2QV2(m), 3QBT(m),<br>2KIE(m), 4CMN(m) | 100                          | 90                           |
| <i>NDP</i>   | 5BQ8(s)                               | -                            | 82                           |
| <i>HPRT1</i> | 1BZY(s)                               | -                            | 100                          |

Table S4. The missense variants identified from 21 disease-associated X-linked genes. Dataset P and B comprised pathogenic and benign variants, respectively. The variants which appeared in both datasets, i.e. overlapping variants, were removed from dataset B.

| <u>Genes</u> | <u>Number of variants in dataset P</u> | <u>Number of variants in dataset B</u> | <u>Overlapping dataset B variants removed</u> | <u>Total</u> |
|--------------|----------------------------------------|----------------------------------------|-----------------------------------------------|--------------|
| <i>G6PD</i>  | 191                                    | 50                                     | 43                                            | 241          |
| <i>ALAS2</i> | 78                                     | 32                                     | 7                                             | 110          |
| <i>RS1</i>   | 146                                    | 39                                     | 2                                             | 185          |
| <i>MTM1</i>  | 110                                    | 81                                     | 0                                             | 191          |
| <i>OTC</i>   | 290                                    | 50                                     | 7                                             | 340          |
| <i>PHEX</i>  | 116                                    | 104                                    | 4                                             | 220          |
| <i>F8</i>    | 1435                                   | 315                                    | 71                                            | 1750         |
| <i>IL2RG</i> | 86                                     | 45                                     | 0                                             | 131          |
| <i>L1CAM</i> | 92                                     | 220                                    | 7                                             | 312          |
| <i>CLCN5</i> | 96                                     | 104                                    | 3                                             | 200          |
| <i>IDS</i>   | 257                                    | 90                                     | 8                                             | 347          |
| <i>GLA</i>   | 554                                    | 30                                     | 26                                            | 584          |
| <i>ABCD1</i> | 332                                    | 113                                    | 7                                             | 445          |
| <i>F9</i>    | 678                                    | 39                                     | 16                                            | 717          |
| <i>GJB1</i>  | 349                                    | 19                                     | 15                                            | 368          |
| <i>AVPR2</i> | 149                                    | 83                                     | 7                                             | 232          |
| <i>PDHA1</i> | 98                                     | 38                                     | 3                                             | 136          |
| <i>BTK</i>   | 291                                    | 37                                     | 2                                             | 328          |
| <i>OCRL</i>  | 83                                     | 107                                    | 1                                             | 190          |
| <i>NDP</i>   | 92                                     | 15                                     | 3                                             | 107          |
| <i>HPRT1</i> | 176                                    | 8                                      | 3                                             | 184          |

Table S5. The pathogenic and benign variants on the modelled and the unmodelled regions. The modelled variants represent variants found on regions with a known structure, or those found in regions shared by both the homologous template and the protein sequence for those proteins without a solved structure. The unmodelled variants represent variants outside of these regions.

| <u>Genes</u> | <u>Pathogenic variants modelled</u> | <u>Benign variants modelled</u> | <u>Pathogenic variants unmodelled</u> | <u>Benign variants unmodelled</u> | <u>All variants modelled (%)</u> |
|--------------|-------------------------------------|---------------------------------|---------------------------------------|-----------------------------------|----------------------------------|
| <i>G6PD</i>  | 188                                 | 48                              | 3                                     | 2                                 | 98                               |
| <i>ALAS2</i> | 78                                  | 19                              | 0                                     | 13                                | 88                               |
| <i>RS1</i>   | 138                                 | 28                              | 8                                     | 11                                | 90                               |
| <i>MTM1</i>  | 110                                 | 62                              | 0                                     | 19                                | 90                               |
| <i>OTC</i>   | 287                                 | 42                              | 3                                     | 8                                 | 97                               |
| <i>PHEX</i>  | 114                                 | 97                              | 2                                     | 7                                 | 96                               |
| <i>F8</i>    | 1381                                | 127                             | 54                                    | 188                               | 86                               |
| <i>IL2RG</i> | 76                                  | 21                              | 10                                    | 24                                | 74                               |
| <i>L1CAM</i> | 75                                  | 135                             | 17                                    | 85                                | 67                               |
| <i>CLCN5</i> | 87                                  | 77                              | 9                                     | 27                                | 82                               |
| <i>IDS</i>   | 257                                 | 79                              | 0                                     | 11                                | 97                               |
| <i>GLA</i>   | 536                                 | 23                              | 18                                    | 7                                 | 96                               |
| <i>ABCD1</i> | 329                                 | 81                              | 3                                     | 32                                | 92                               |
| <i>F9</i>    | 625                                 | 21                              | 53                                    | 18                                | 90                               |
| <i>GJB1</i>  | 330                                 | 9                               | 19                                    | 10                                | 92                               |
| <i>AVPR2</i> | 148                                 | 71                              | 1                                     | 12                                | 94                               |
| <i>PDHA1</i> | 97                                  | 32                              | 1                                     | 6                                 | 95                               |
| <i>BTK</i>   | 288                                 | 32                              | 3                                     | 5                                 | 98                               |
| <i>OCRL</i>  | 83                                  | 89                              | 0                                     | 18                                | 91                               |
| <i>NDP</i>   | 84                                  | 8                               | 8                                     | 7                                 | 86                               |
| <i>HPRT1</i> | 176                                 | 8                               | 0                                     | 0                                 | 100                              |

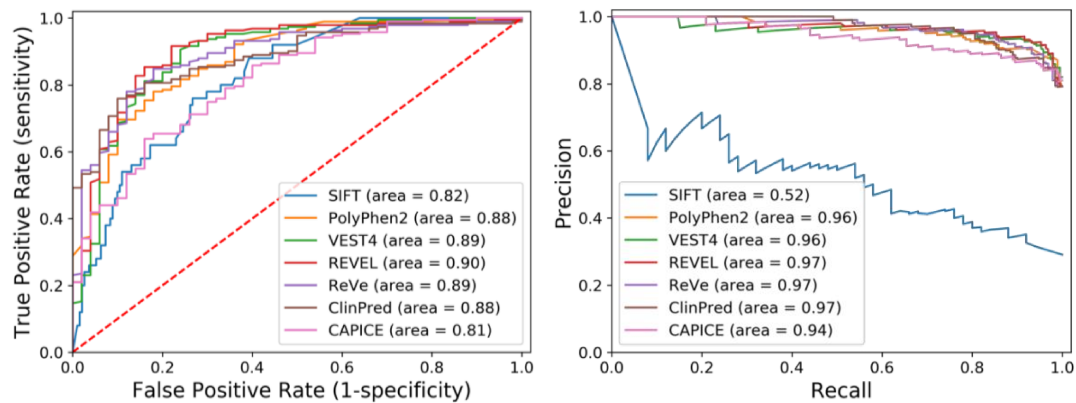

Figure S1. The area under the receiver operating characteristic (ROC) curve (left panel) and the precision recall (PR) curve (right panel) of different prediction tools in classifying *G6PD* variants (191 pathogenic and 50 benign variants).

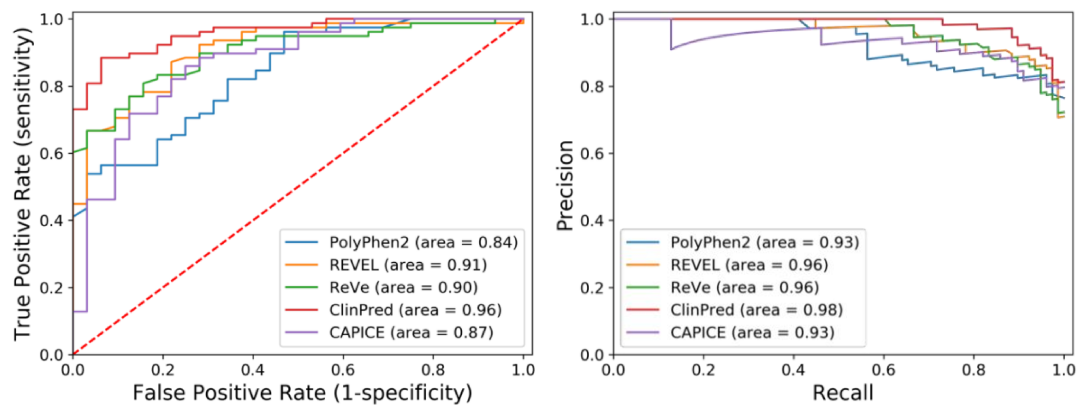

Figure S2. The area under the receiver operating characteristic (ROC) curve (left panel) and the precision recall (PR) curve (right panel) of different prediction tools in classifying *ALAS2* variants. SIFT and VEST4 predictions were unavailable for the variants in the transcript of interest (78 pathogenic and 32 benign variants).

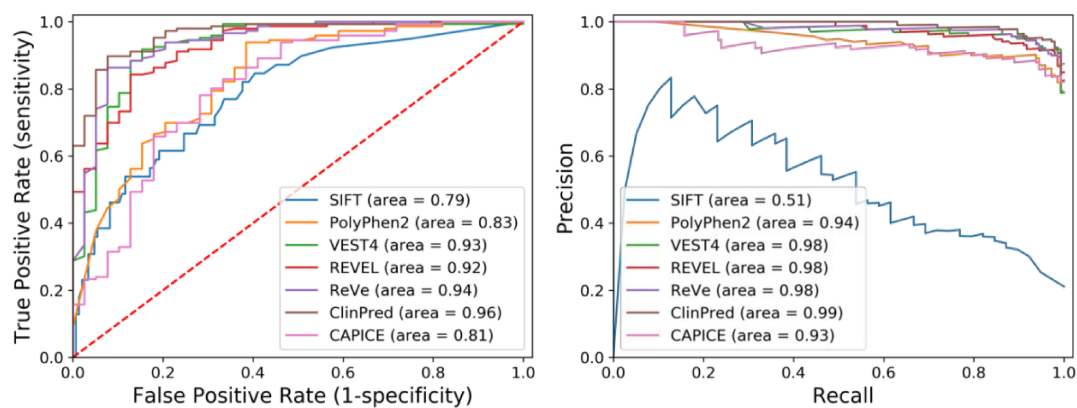

Figure S3. The area under the receiver operating characteristic (ROC) curve (left panel) and the precision recall (PR) curve (right panel) of different prediction tools in classifying *RS1* variants (146 pathogenic and 39 benign variants).

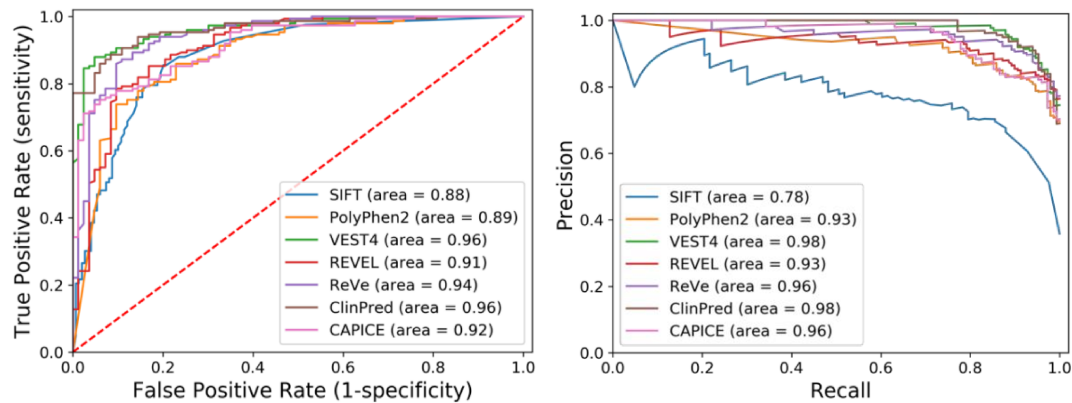

Figure S4. The area under the receiver operating characteristic (ROC) curve (left panel) and the precision recall (PR) curve (right panel) of different prediction tools in classifying *AVPR2* variants (149 pathogenic and 83 benign variants).

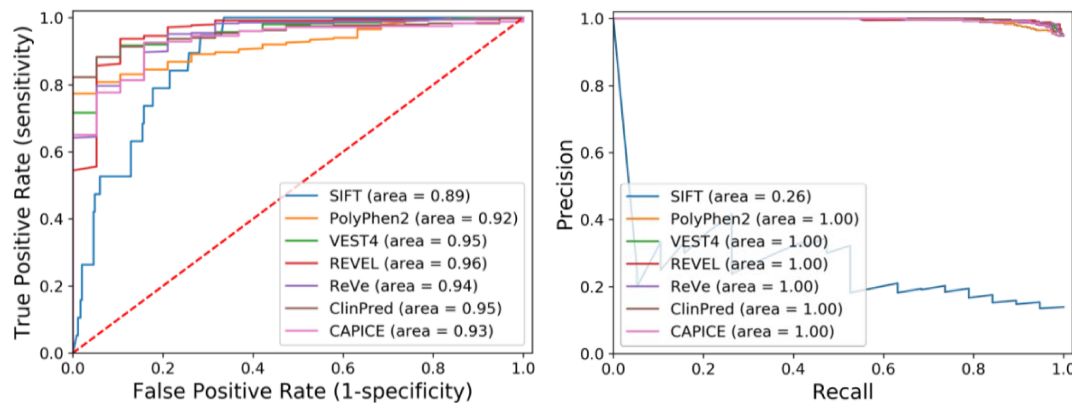

Figure S5. The area under the receiver operating characteristic (ROC) curve (left panel) and the precision recall (PR) curve (right panel) of different prediction tools in classifying *GJB1* variants (349 pathogenic and 19 benign variants).

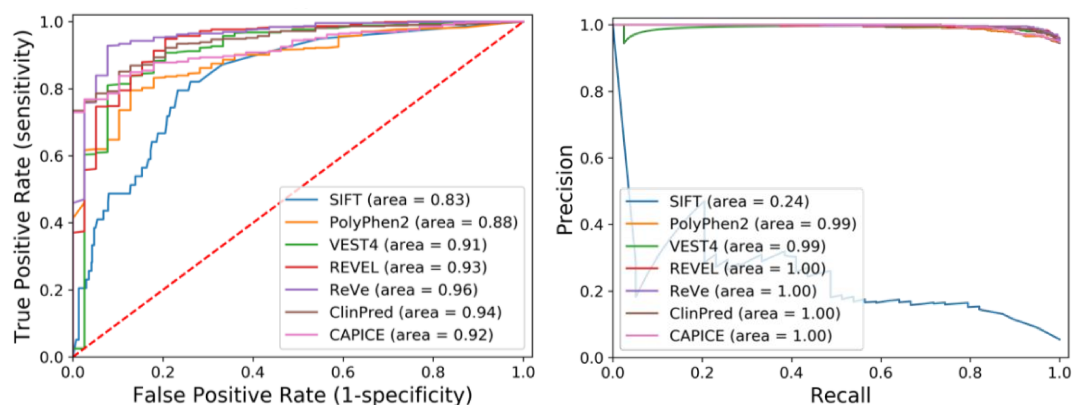

Figure S6. The area under the receiver operating characteristic (ROC) curve (left panel) and the precision recall (PR) curve (right panel) of different prediction tools in classifying *F9* variants (678 pathogenic and 39 benign variants).

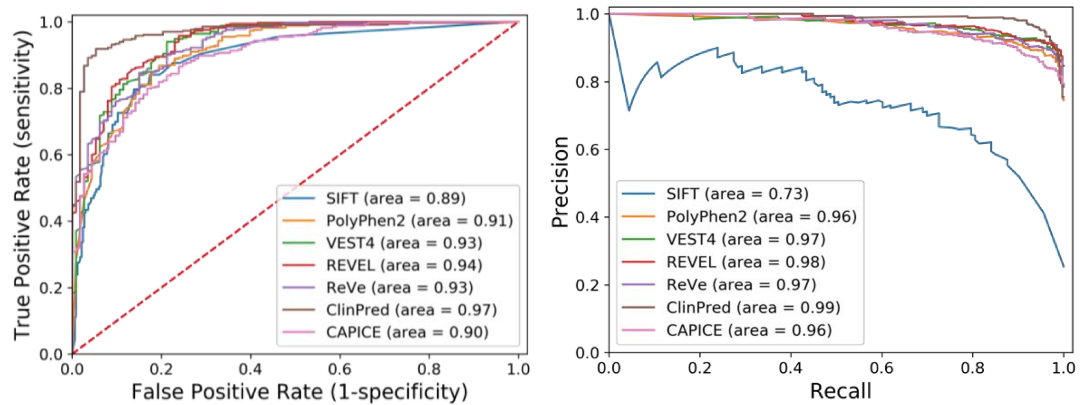

Figure S7. The area under the receiver operating characteristic (ROC) curve (left panel) and the precision recall (PR) curve (right panel) of different prediction tools in classifying *ABCD1* variants (332 pathogenic and 113 benign variants).

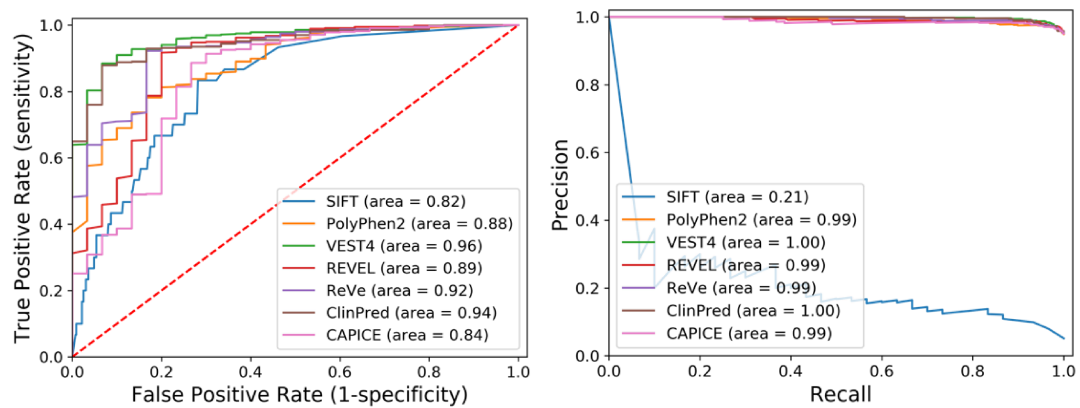

Figure S8. The area under the receiver operating characteristic (ROC) curve (left panel) and the precision recall (PR) curve (right panel) of different prediction tools in classifying *GLA* variants (554 pathogenic and 30 benign variants).

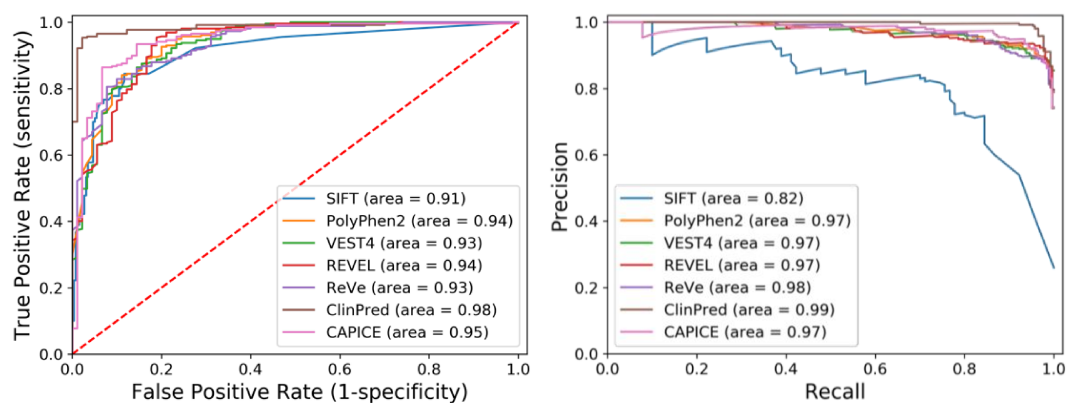

Figure S9. The area under the receiver operating characteristic (ROC) curve (left panel) and the precision recall (PR) curve (right panel) of different prediction tools in classifying *IDS* variants (257 pathogenic and 90 benign variants).

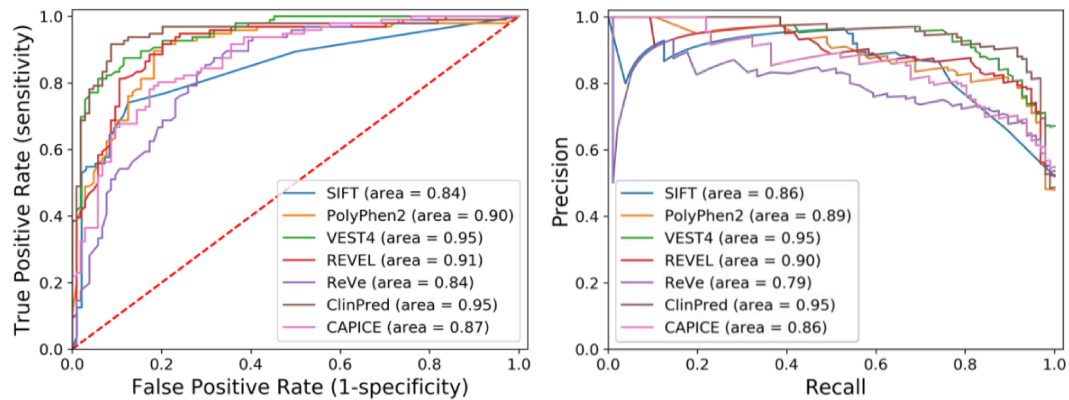

Figure S10. The area under the receiver operating characteristic (ROC) curve (left panel) and the precision recall (PR) curve (right panel) of different prediction tools in classifying *CLCN5* variants (96 pathogenic and 104 benign variants).

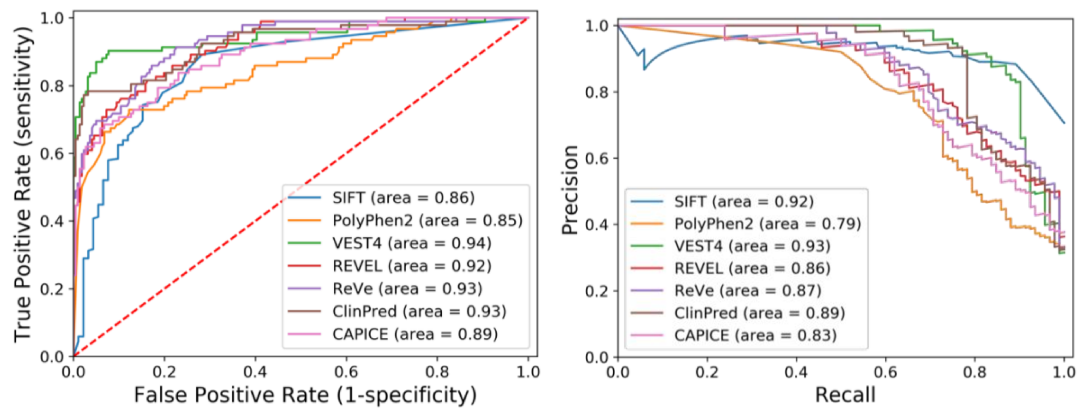

Figure S11. The area under the receiver operating characteristic (ROC) curve (left panel) and the precision recall (PR) curve (right panel) of different prediction tools in classifying *L1CAM* variants (92 pathogenic and 220 benign variants).

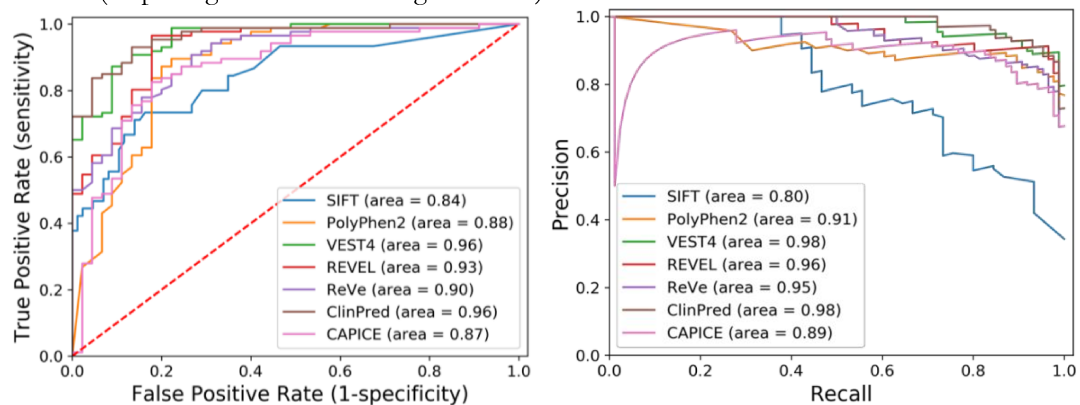

Figure S12. The area under the receiver operating characteristic (ROC) curve (left panel) and the precision recall (PR) curve (right panel) of different prediction tools in classifying *IL2RG* variants (86 pathogenic and 45 benign variants).



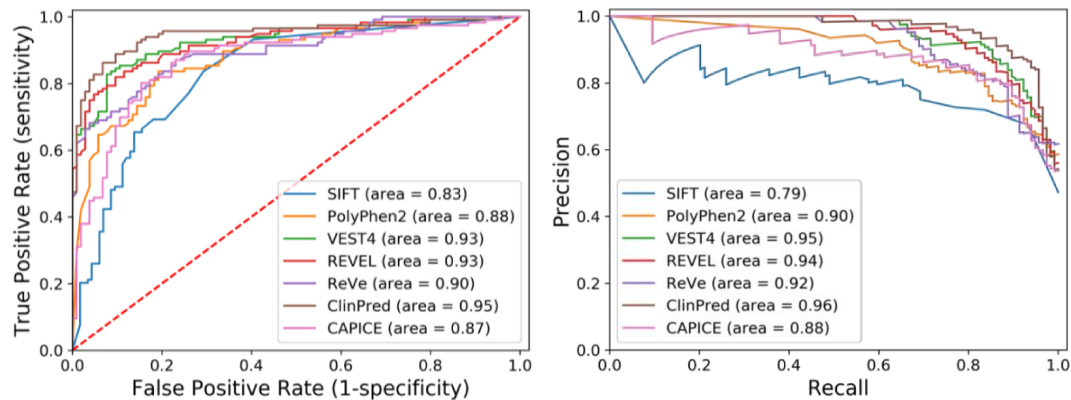

Figure S13. The area under the receiver operating characteristic (ROC) curve (left panel) and the precision recall (PR) curve (right panel) of different prediction tools in classifying *PHEX* variants (116 pathogenic and 104 benign variants).

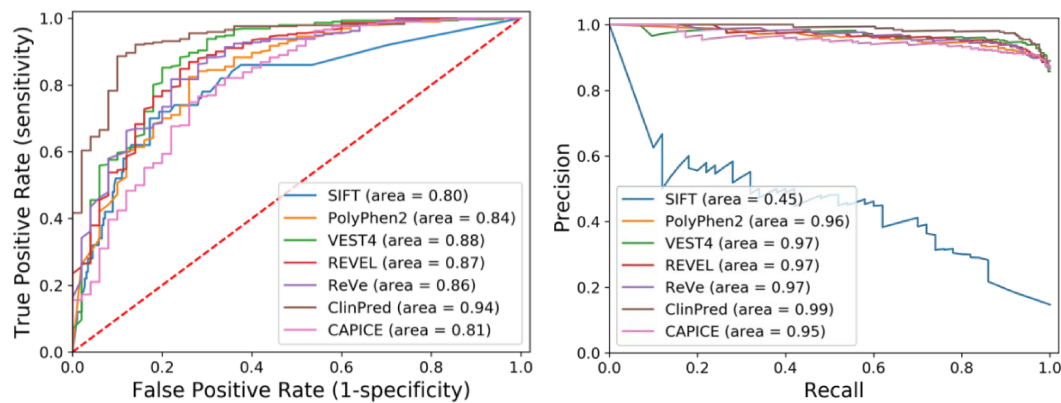

Figure S14. The area under the receiver operating characteristic (ROC) curve (left panel) and the precision recall (PR) curve (right panel) of different prediction tools in classifying *OTC* variants (290 pathogenic and 50 benign variants).

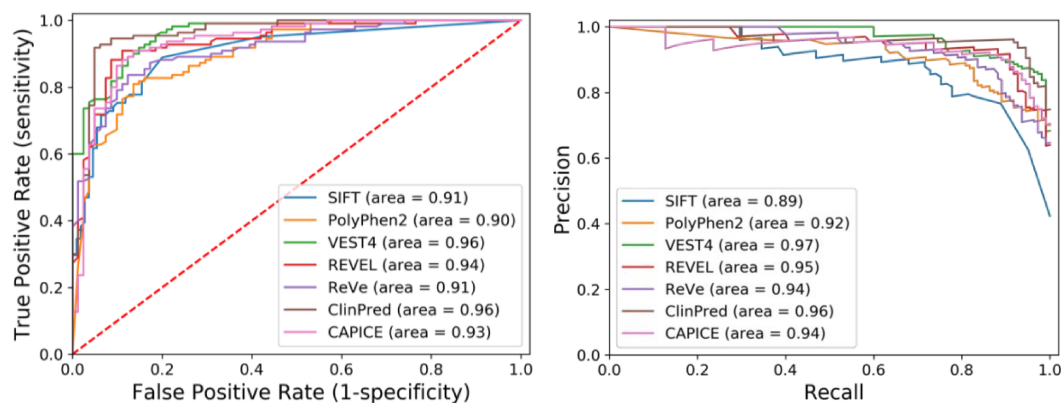

Figure S15. The area under the receiver operating characteristic (ROC) curve (left panel) and the precision recall (PR) curve (right panel) of different prediction tools in classifying *MTM1* variants (110 pathogenic and 81 benign variants).



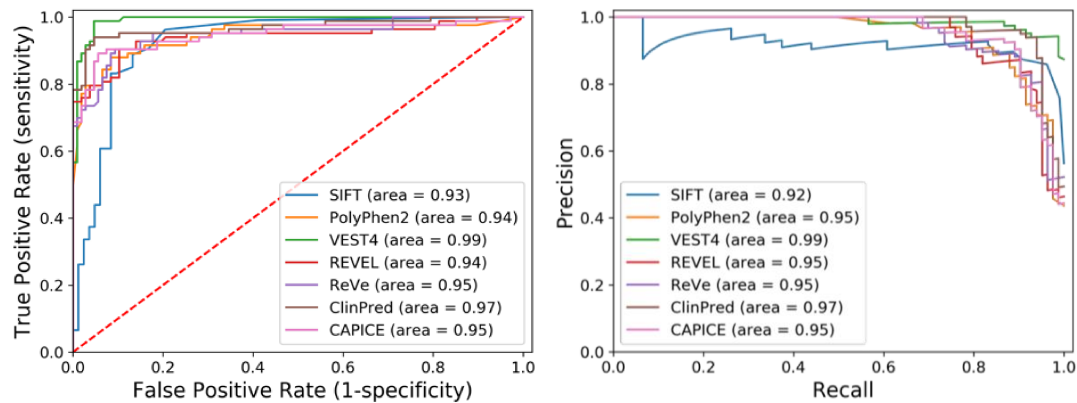

Figure S16. The area under the receiver operating characteristic (ROC) curve (left panel) and the precision recall (PR) curve (right panel) of different prediction tools in classifying *OCRL* variants (83 pathogenic and 107 benign variants).

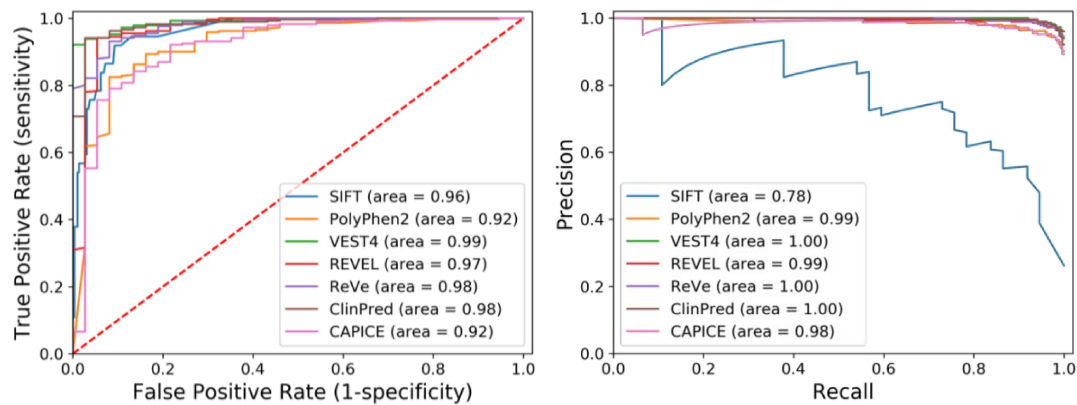

Figure S17. The area under the receiver operating characteristic (ROC) curve (left panel) and the precision recall (PR) curve (right panel) of different prediction tools in classifying *BTK* variants (291 pathogenic and 37 benign variants).

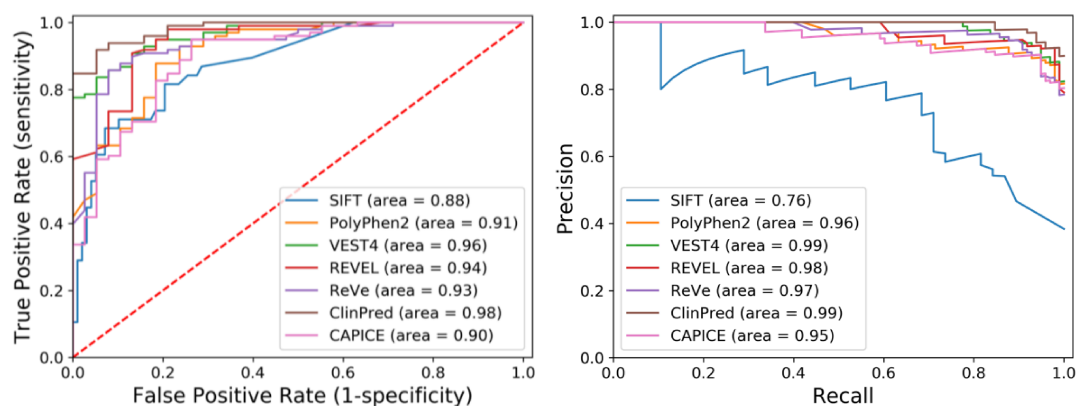

Figure S18. The area under the receiver operating characteristic (ROC) curve (left panel) and the precision recall (PR) curve (right panel) of different prediction tools in classifying *PDHAI* variants (98 pathogenic and 38 benign variants).

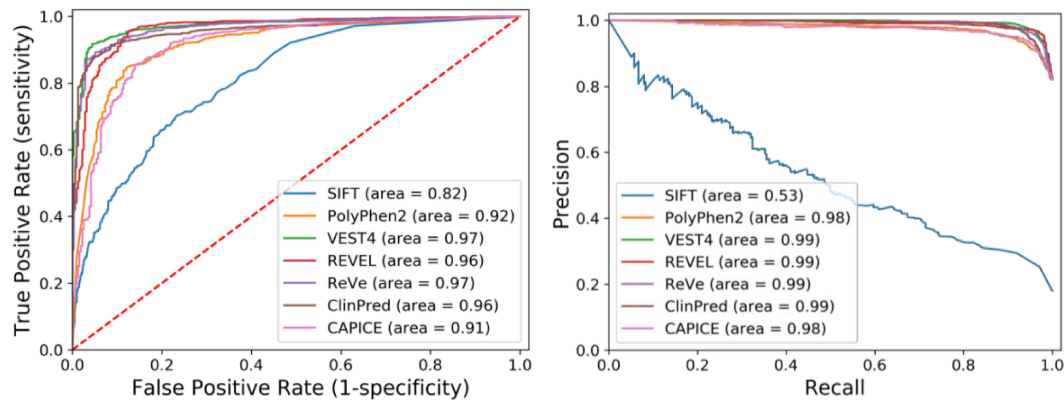

Figure S19. The area under the receiver operating characteristic (ROC) curve (left panel) and the precision recall (PR) curve (right panel) of different prediction tools in classifying *F8* variants (1435 pathogenic and 315 benign variants).

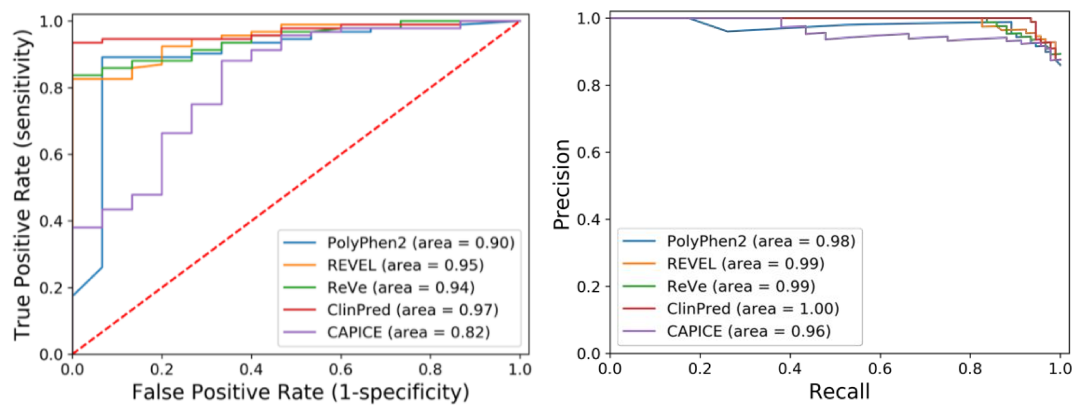

Figure 20. The area under the receiver operating characteristic (ROC) curve (left panel) and the precision recall (PR) curve (right panel) of different prediction tools in classifying *NDP* variants (92 pathogenic and 15 benign variants). SIFT and VEST4 predictions were unavailable for the variants in the transcript of interest.

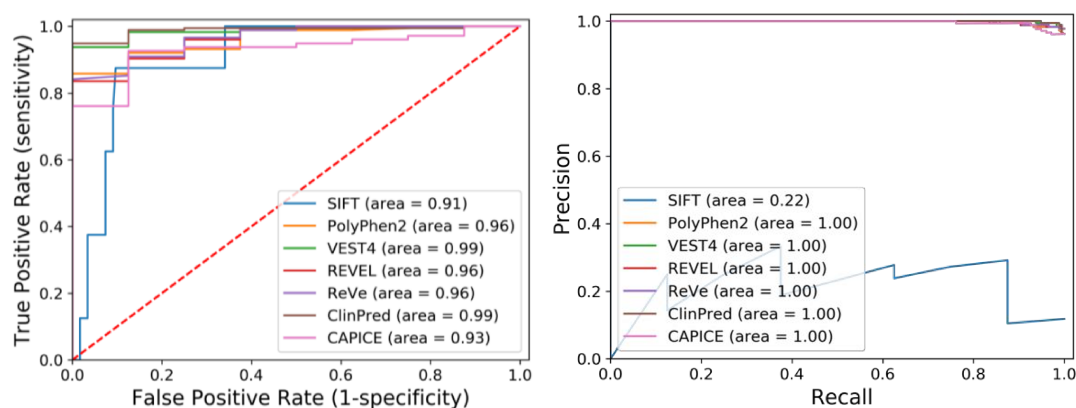

Figure S21. The area under the receiver operating characteristic (ROC) curve (left panel) and the precision recall (PR) curve (right panel) of different prediction tools in classifying *HPRT1* variants (176 pathogenic and 8 benign variants).

Table S6. The three algorithms used in building ProSper. A minimum number of features were retained, *i.e.* selected features, while maintaining the highest possible performance as measured by the Matthews Correlation Coefficient (MCC) test. The dropped features either did not impact model performance or increased model performance.

| <u>Genes</u> | <u>WEKA algorithm</u> | <u>Number of features considered</u> | <u>Number of features selected</u> |
|--------------|-----------------------|--------------------------------------|------------------------------------|
| <i>G6PD</i>  | Logit Boost           | 17                                   | 3                                  |
| <i>ALAS2</i> | Hoeffding Tree        | 17                                   | 5                                  |
| <i>RS1</i>   | Logit Boost           | 18                                   | 9                                  |
| <i>MTM1</i>  | Hoeffding Tree        | 18                                   | 6                                  |
| <i>OTC</i>   | Hoeffding Tree        | 19                                   | 9                                  |
| <i>PHEX</i>  | Logit Boost           | 19                                   | 5                                  |
| <i>F8</i>    | Logit Boost           | 20                                   | 8                                  |
| <i>IL2RG</i> | Hoeffding Tree        | 18                                   | 13                                 |
| <i>L1CAM</i> | Simple Logistic       | 19                                   | 4                                  |
| <i>CLCN5</i> | Hoeffding Tree        | 19                                   | 15                                 |
| <i>IDS</i>   | Hoeffding Tree        | 18                                   | 3                                  |
| <i>GLA</i>   | Simple Logistic       | 18                                   | 9                                  |
| <i>ABCD1</i> | Logit Boost           | 20                                   | 6                                  |
| <i>F9</i>    | Hoeffding Tree        | 19                                   | 6                                  |
| <i>GJB1</i>  | Hoeffding Tree        | 18                                   | 4                                  |
| <i>AVPR2</i> | Logit Boost           | 18                                   | 9                                  |
| <i>PDHA1</i> | Hoeffding Tree        | 17                                   | 12                                 |
| <i>BTK</i>   | Hoeffding Tree        | 20                                   | 5                                  |
| <i>OCRL</i>  | Hoeffding Tree        | 21                                   | 4                                  |
| <i>NDP</i>   | Hoeffding Tree        | 17                                   | 10                                 |
| <i>HPRT1</i> | Hoeffding Tree        | 19                                   | 6                                  |

Table S7. The most informative features identified for each gene in developing ProSper.

| <u>Genes</u> | <u>Features selected</u>                                                                                                                                                                                                                                                                                                                                               |
|--------------|------------------------------------------------------------------------------------------------------------------------------------------------------------------------------------------------------------------------------------------------------------------------------------------------------------------------------------------------------------------------|
| <i>G6PD</i>  | Conservation, solvent accessibility, predicted to impact protein stability                                                                                                                                                                                                                                                                                             |
| <i>ALAS2</i> | Reference amino acid, residue number, on modelled regions, conservation, predicted to impact protein stability                                                                                                                                                                                                                                                         |
| <i>RS1</i>   | On modelled regions, conservation, loss or gain of charged residues, loss or gain of proline, loss or gain of cysteine, solvent accessibility, goodness-of-fit, predicted to impact protein stability, predicted to impact protein-protein interaction                                                                                                                 |
| <i>OTC</i>   | On modelled regions, conservation, loss or gain of proline, disordered region, solvent accessibility, goodness-of-fit, loss or gain of charged residues, predicted to impact protein stability, predicted to impact protein-protein interaction                                                                                                                        |
| <i>LICAM</i> | Reference amino acid, alternative amino acid, conservation, loss or gain of hydrophobic residues                                                                                                                                                                                                                                                                       |
| <i>MTM1</i>  | Residue number, conservation, disordered region, solvent accessibility, goodness-of-fit, predicted to impact protein stability                                                                                                                                                                                                                                         |
| <i>ABCD1</i> | Residue number, on modelled regions, conservation, loss or gain of proline, disordered region, solvent accessibility                                                                                                                                                                                                                                                   |
| <i>PHEX</i>  | Alternative amino acid, conservation, goodness-of-fit, solvent accessibility, predicted to impact protein stability                                                                                                                                                                                                                                                    |
| <i>CLCN5</i> | Reference amino acid, alternative amino acid, residue number, topology, on modelled regions, conservation, secondary structure, disordered region, solvent accessibility, goodness-of-fit, change in residue volume, loss or gain of charged residues, predicted to impact protein stability, predicted to impact protein-protein interaction, loss or gain of glycine |
| <i>F8</i>    | On modelled regions, conservation, disordered region, solvent accessibility, goodness-of-fit, loss or gain of hydrophobic residues, change in residue volume, predicted to impact protein stability                                                                                                                                                                    |
| <i>GLA</i>   | On modelled regions, conservation, disordered region, solvent accessibility, goodness-of-fit, loss or gain of hydrophobic residues, change in residue volume, predicted to impact protein stability, predicted to impact protein-protein interaction                                                                                                                   |

|              |                                                                                                                                                                                                                                                                                                                                                    |
|--------------|----------------------------------------------------------------------------------------------------------------------------------------------------------------------------------------------------------------------------------------------------------------------------------------------------------------------------------------------------|
| <i>IL2RG</i> | Alternative amino acid, topology, on modelled regions, conservation, loss or gain of cysteine, disordered region, solvent accessibility, goodness-of-fit, change in residue volume, loss or gain of charged residues, predicted to impact protein stability, predicted to impact protein-protein interaction, loss or gain of hydrophobic residues |
| <i>AVPR2</i> | Reference amino acid, residue number, conservation, topology, disordered region, goodness-of-fit, solvent accessibility, loss or gain of charged residues, predicted to impact protein stability                                                                                                                                                   |
| <i>IDS</i>   | Residue number, conservation, goodness-of-fit                                                                                                                                                                                                                                                                                                      |
| <i>NDP</i>   | Reference amino acid, alternative amino acid, residue number, on modelled regions, conservation, disordered region, goodness-of-fit, glycine, loss or gain of cysteine, change in residue volume                                                                                                                                                   |
| <i>PDHA1</i> | Reference amino acid, alternative amino acid, residue number, on modelled regions, conservation, secondary structure, disordered region, change in residue volume, goodness-of-fit, solvent accessibility, predicted to impact protein stability, predicted to impact protein-protein interaction                                                  |
| <i>OCRL</i>  | Disordered region, variant clustering region, conservation, predicted to impact protein stability                                                                                                                                                                                                                                                  |
| <i>BTK</i>   | Conservation, disordered region, goodness-of-fit, binding site, solvent accessibility                                                                                                                                                                                                                                                              |
| <i>GJB1</i>  | Residue number, on modelled regions, conservation, disordered region                                                                                                                                                                                                                                                                               |
| <i>F9</i>    | Residue number, conservation, disordered region, change in residue volume, predicted to impact protein stability, predicted to impact protein-protein interaction                                                                                                                                                                                  |
| <i>HPRT1</i> | Reference amino acid, alternative amino acid, disordered region, solvent accessibility, goodness-of-fit, predicted to impact protein stability                                                                                                                                                                                                     |

Table S8. The performance of ProSper in classifying variants of 21 X-linked genes as evaluated using the area under the curve (AUC) of the Receiver Operating Characteristic (ROC), the AUC of the Precision Recall (PR), and the Matthews Correlation Coefficient (MCC) test.

| <u>Genes</u> | <u>AUC ROC</u> | <u>AUC PR</u> | <u>MCC</u> |
|--------------|----------------|---------------|------------|
| <i>G6PD</i>  | 0.78           | 0.75          | 0.55       |
| <i>ALAS2</i> | 0.90           | 0.90          | 0.62       |
| <i>RS1</i>   | 0.88           | 0.87          | 0.65       |
| <i>OTC</i>   | 0.89           | 0.87          | 0.67       |
| <i>L1CAM</i> | 0.88           | 0.88          | 0.69       |
| <i>MTM1</i>  | 0.89           | 0.88          | 0.70       |
| <i>ABCD1</i> | 0.92           | 0.91          | 0.72       |
| <i>PHEX</i>  | 0.91           | 0.90          | 0.74       |
| <i>CLCN5</i> | 0.91           | 0.91          | 0.75       |
| <i>F8</i>    | 0.93           | 0.93          | 0.75       |
| <i>GLA</i>   | 0.95           | 0.94          | 0.75       |
| <i>IL2RG</i> | 0.91           | 0.90          | 0.77       |
| <i>AVPR2</i> | 0.92           | 0.91          | 0.77       |
| <i>IDS</i>   | 0.93           | 0.92          | 0.77       |
| <i>NDP</i>   | 0.96           | 0.95          | 0.78       |
| <i>PDHA1</i> | 0.95           | 0.95          | 0.79       |
| <i>OCRL</i>  | 0.95           | 0.93          | 0.83       |
| <i>BTK</i>   | 0.96           | 0.96          | 0.83       |
| <i>GJB1</i>  | 0.95           | 0.93          | 0.84       |
| <i>F9</i>    | 0.97           | 0.97          | 0.85       |
| <i>HPRT1</i> | 1              | 1             | 1          |

Table S9a. The gene- or protein-specific pathogenicity thresholds identified in 21 genes for three prediction tools using all of the datasets. The gene-specific threshold was identified using 80% of the predictions from VEST4, REVEL, and ClinPred through repeated ( $n=10$ ) 5-fold cross-validation with random subsampling. The rest (20%) of the predictions from each tool was used to test the newly identified threshold using the Matthews Correlation Coefficient (MCC) test, *i.e.* optimised MCC. The VEST4 predictions were unavailable for *ALAS2* and *NDP* variants in the respective transcripts of interest.

| <u>Genes</u> | <u>VEST4 threshold</u> | <u>REVEL threshold</u> | <u>ClinPred threshold</u> |
|--------------|------------------------|------------------------|---------------------------|
| G6PD         | 0.44±0.02              | 0.59±0.02              | 0.53±0.19                 |
| ALAS2        | -                      | 0.61±0.06              | 0.74±0.25                 |
| RS1          | 0.70±0.07              | 0.65±0.00              | 0.76±0.04                 |
| MTM1         | 0.70±0.07              | 0.80±0.00              | 0.95±0.00                 |
| OTC          | 0.59±0.05              | 0.69±0.07              | 0.65±0.11                 |
| PHEX         | 0.84±0.05              | 0.81±0.04              | 0.89±0.05                 |
| F8           | 0.30±0.00              | 0.49±0.02              | 0.59±0.03                 |
| IL2RG        | 0.25±0.00              | 0.53±0.03              | 0.40±0.13                 |
| L1CAM        | 0.60±0.05              | 0.59±0.06              | 0.95±0.00                 |
| CLCN5        | 0.83±0.04              | 0.86±0.04              | 0.95±0.02                 |
| IDS          | 0.43±0.02              | 0.73±0.02              | 0.95±0.00                 |
| GLA          | 0.42±0.05              | 0.36±0.10              | 0.40±0.02                 |
| ABCD1        | 0.59±0.05              | 0.71±0.06              | 0.78±0.03                 |
| F9           | 0.24±0.03              | 0.45±0.00              | 0.39±0.09                 |
| GJB1         | 0.29±0.12              | 0.41±0.03              | 0.47±0.15                 |
| AVPR2        | 0.64±0.06              | 0.29±0.05              | 0.73±0.07                 |
| PDHA1        | 0.62±0.03              | 0.70±0.00              | 0.70±0.17                 |
| BTK          | 0.49±0.06              | 0.37±0.02              | 0.70±0.00                 |
| OCRL         | 0.70±0.02              | 0.76±0.15              | 0.95±0.00                 |
| NDP          | -                      | 0.50±0.06              | 0.54±0.13                 |
| HPRT1        | 0.40±0.00              | 0.52±0.04              | 0.59±0.03                 |

Table S9b. A comparison of the Matthews Correlation Coefficient (MCC) scores with the optimized MCC for the performance of REVEL, VEST4, and ClinPred using all of the datasets. The optimized MCC was generated using gene- or protein-specific pathogenicity thresholds. The gene-specific threshold was identified using 80% of the predictions from VEST4, REVEL, and ClinPred through repeated ( $n=10$ ) 5-fold cross-validation with random subsampling. The optimized MCC score was generated using the rest (20%) of the predictions from each tool at the threshold identified for each gene. The original MCC score was generated using the suggested and widely used threshold of 0.5. The improvement in prediction performance, i.e. a higher optimized MCC score compared to the original, is highlighted in bold. The VEST4 predictions were unavailable for *ALAS2* and *NDP* variants in the respective transcripts of interest.

| Genes | VEST4    |                   | REVEL    |                   | ClinPred |                   |
|-------|----------|-------------------|----------|-------------------|----------|-------------------|
|       | Original | Optimised         | Original | Optimised         | Original | Optimised         |
| G6PD  | 0.59     | <b>0.63</b> ±0.12 | 0.61     | <b>0.63</b> ±0.16 | 0.52     | 0.47±0.13         |
| ALAS2 | -        | -                 | 0.63     | 0.63±0.15         | 0.73     | 0.70±0.10         |
| RS1   | 0.69     | <b>0.71</b> ±0.08 | 0.59     | <b>0.64</b> ±0.15 | 0.69     | <b>0.70</b> ±0.13 |
| MTM1  | 0.71     | <b>0.75</b> ±0.06 | 0.58     | <b>0.77</b> ±0.09 | 0.66     | <b>0.86</b> ±0.07 |
| OTC   | 0.61     | 0.60±0.10         | 0.46     | 0.44±0.11         | 0.65     | 0.63±0.09         |
| PHEX  | 0.62     | <b>0.74</b> ±0.08 | 0.58     | <b>0.66</b> ±0.07 | 0.62     | <b>0.72</b> ±0.07 |
| F8    | 0.75     | <b>0.79</b> ±0.02 | 0.82     | 0.80±0.03         | 0.74     | <b>0.76</b> ±0.02 |
| IL2RG | 0.74     | 0.73±0.07         | 0.78     | 0.71±0.10         | 0.78     | 0.69±0.09         |
| L1CAM | 0.73     | <b>0.79</b> ±0.08 | 0.65     | 0.61±0.09         | 0.58     | <b>0.75</b> ±0.06 |
| CLCN5 | 0.59     | <b>0.70</b> ±0.09 | 0.42     | <b>0.64</b> ±0.09 | 0.58     | <b>0.81</b> ±0.07 |
| IDS   | 0.67     | 0.66±0.07         | 0.64     | <b>0.75</b> ±0.06 | 0.79     | <b>0.89</b> ±0.05 |
| GLA   | 0.57     | 0.53±0.14         | 0.53     | 0.47±0.14         | 0.52     | <b>0.54</b> ±0.11 |
| ABCD1 | 0.72     | 0.68±0.04         | 0.68     | <b>0.71</b> ±0.05 | 0.75     | <b>0.79</b> ±0.04 |
| F9    | 0.39     | <b>0.40</b> ±0.12 | 0.57     | <b>0.59</b> ±0.09 | 0.50     | 0.38±0.11         |
| GJB1  | 0.49     | <b>0.51</b> ±0.13 | 0.67     | <b>0.68</b> ±0.09 | 0.53     | 0.40±0.17         |
| AVPR2 | 0.76     | 0.73±0.08         | 0.62     | <b>0.68</b> ±0.05 | 0.73     | <b>0.74</b> ±0.06 |
| PDHA1 | 0.70     | 0.70±0.09         | 0.60     | <b>0.77</b> ±0.11 | 0.80     | 0.77±0.06         |
| BTK   | 0.80     | 0.72±0.16         | 0.80     | 0.74±0.10         | 0.72     | <b>0.77</b> ±0.13 |
| OCRL  | 0.78     | <b>0.92</b> ±0.06 | 0.76     | 0.70±0.10         | 0.62     | <b>0.89</b> ±0.07 |
| NDP   | -        | -                 | 0.63     | 0.58±0.12         | 0.75     | 0.69±0.12         |
| HPRT1 | 0.73     | 0.44±0.33         | 0.62     | 0.40±0.42         | 0.79     | 0.44±0.45         |



Table S10a. The gene- or protein-specific pathogenicity thresholds identified in 21 genes for three prediction tools using a subset of each of the datasets. For each gene, the dataset was balanced using undersampling, *i.e.* using a random subset from the majority class to match the number of variants in the minority class. The gene-specific threshold was identified using 80% of the predictions from VEST4, REVEL, and ClinPred through repeated ( $n=10$ ) 5-fold cross-validation with random subsampling. The rest (20%) of the predictions from each tool was used to test the newly identified threshold using the Matthews Correlation Coefficient (MCC) test, *i.e.* optimised MCC. The VEST4 predictions were unavailable for *ALAS2* and *NDP* variants in the respective transcripts of interest.

| <u>Genes</u> | <u>VEST4 threshold</u> | <u>REVEL threshold</u> | <u>ClinPred threshold</u> |
|--------------|------------------------|------------------------|---------------------------|
| G6PD         | 0.49±0.09              | 0.72±0.08              | 0.74±0.14                 |
| ALAS2        | -                      | 0.75±0.11              | 0.89±0.04                 |
| RS1          | 0.82±0.03              | 0.74±0.07              | 0.86±0.09                 |
| MTM1         | 0.69±0.07              | 0.82±0.02              | 0.95±0.00                 |
| OTC          | 0.73±0.11              | 0.78±0.05              | 0.87±0.03                 |
| PHEX         | 0.85±0.00              | 0.79±0.05              | 0.92±0.05                 |
| F8           | 0.45±0.05              | 0.58±0.06              | 0.78±0.09                 |
| IL2RG        | 0.40±0.06              | 0.55±0.00              | 0.75±0.17                 |
| L1CAM        | 0.56±0.02              | 0.40±0.15              | 0.95±0.00                 |
| CLCN5        | 0.82±0.05              | 0.87±0.04              | 0.94±0.03                 |
| IDS          | 0.69±0.10              | 0.77±0.02              | 0.95±0.02                 |
| GLA          | 0.68±0.10              | 0.59±0.10              | 0.80±0.13                 |
| ABCD1        | 0.70±0.09              | 0.79±0.05              | 0.94±0.05                 |
| F9           | 0.50±0.00              | 0.63±0.12              | 0.73±0.18                 |
| GJB1         | 0.49±0.08              | 0.59±0.08              | 0.72±0.14                 |
| AVPR2        | 0.69±0.03              | 0.42±0.07              | 0.85±0.08                 |
| PDHA1        | 0.68±0.08              | 0.74±0.05              | 0.92±0.11                 |
| BTK          | 0.67±0.05              | 0.72±0.04              | 0.92±0.08                 |
| OCRL         | 0.70±0.02              | 0.66±0.15              | 0.95±0.00                 |
| NDP          | -                      | 0.59±0.06              | 0.59±0.02                 |
| HPRT1        | 0.58±0.18              | 0.79±0.07              | 0.79±0.12                 |

Table S10b. A comparison of the Matthews Correlation Coefficient (MCC) scores with the optimized MCC scores for the performance of REVEL, VEST4, and ClinPred using a subset of each dataset. For each gene, the dataset was balanced using undersampling, *i.e.* using a random subset from the majority class to match the number of variants in the minority class. The optimized MCC was generated using gene- or protein-specific pathogenicity thresholds. The gene-specific threshold was identified using 80% of the predictions from VEST4, REVEL, and ClinPred through repeated ( $n=10$ ) 5-fold cross-validation with random subsampling. The optimized MCC score was generated using the rest (20%) of the predictions from each tool at the threshold identified for each gene. The original MCC score was generated using the suggested and widely used threshold of 0.5. The improvement in prediction performance, *i.e.* a higher optimized MCC score compared to the original, is highlighted in bold. The VEST4 predictions were unavailable for *ALAS2* and *NDP* variants in the respective transcripts of interest.

| Genes | VEST4    |                  | REVEL    |                  | ClinPred |                  |
|-------|----------|------------------|----------|------------------|----------|------------------|
|       | Original | Optimised        | Original | Optimised        | Original | Optimised        |
| G6PD  | 0.59     | 0.58±0.14        | 0.61     | 0.51±0.19        | 0.52     | 0.50±0.14        |
| ALAS2 | -        | -                | 0.63     | 0.63±0.20        | 0.73     | <b>0.76±0.14</b> |
| RS1   | 0.69     | 0.61±0.15        | 0.59     | <b>0.61±0.10</b> | 0.69     | <b>0.72±0.14</b> |
| MTM1  | 0.71     | 0.71±0.09        | 0.58     | <b>0.72±0.09</b> | 0.66     | <b>0.86±0.06</b> |
| OTC   | 0.61     | 0.61±0.12        | 0.46     | <b>0.60±0.12</b> | 0.65     | <b>0.77±0.08</b> |
| PHEX  | 0.62     | <b>0.77±0.08</b> | 0.58     | <b>0.67±0.07</b> | 0.62     | <b>0.75±0.08</b> |
| F8    | 0.75     | <b>0.86±0.04</b> | 0.82     | <b>0.83±0.02</b> | 0.74     | <b>0.83±0.03</b> |
| IL2RG | 0.74     | 0.66±0.12        | 0.78     | 0.70±0.13        | 0.78     | 0.68±0.12        |
| L1CAM | 0.73     | <b>0.82±0.05</b> | 0.65     | 0.60±0.11        | 0.58     | <b>0.78±0.07</b> |
| CLCN5 | 0.59     | <b>0.66±0.08</b> | 0.42     | <b>0.66±0.08</b> | 0.58     | <b>0.75±0.07</b> |
| IDS   | 0.67     | <b>0.71±0.04</b> | 0.64     | <b>0.77±0.08</b> | 0.79     | <b>0.89±0.08</b> |
| GLA   | 0.57     | <b>0.74±0.11</b> | 0.53     | <b>0.61±0.16</b> | 0.52     | <b>0.75±0.12</b> |
| ABCD1 | 0.72     | 0.72±0.06        | 0.68     | <b>0.76±0.06</b> | 0.75     | <b>0.88±0.07</b> |
| F9    | 0.39     | <b>0.74±0.13</b> | 0.57     | <b>0.60±0.17</b> | 0.50     | <b>0.68±0.14</b> |
| GJB1  | 0.49     | <b>0.84±0.13</b> | 0.67     | 0.66±0.15        | 0.53     | <b>0.67±0.21</b> |
| AVPR2 | 0.76     | <b>0.77±0.07</b> | 0.62     | <b>0.66±0.13</b> | 0.73     | <b>0.77±0.08</b> |
| PDHA1 | 0.70     | 0.60±0.17        | 0.60     | <b>0.67±0.17</b> | 0.80     | 0.78±0.05        |
| BTK   | 0.80     | <b>0.88±0.08</b> | 0.80     | <b>0.85±0.09</b> | 0.72     | <b>0.82±0.12</b> |
| OCRL  | 0.78     | <b>0.92±0.04</b> | 0.76     | 0.74±0.11        | 0.62     | <b>0.88±0.05</b> |
| NDP   | -        | -                | 0.63     | 0.62±0.28        | 0.75     | <b>0.88±0.15</b> |
| HPRT1 | 0.73     | 0.59±0.44        | 0.62     | 0.61±0.38        | 0.79     | 0.76±0.40        |
